# Supplementary material for: Seasonal changes in the D/H ratio of fatty acids of pelagic microorganisms in the coastal North Sea
Source: Copernicus journal article supplement (doi:10.5194/bg-2016-125), 2016-04-20

## Supplementary Data: Tables

**Table S1:** Chlorophyll *a* concentration measured between the 16/08/10 and the 15/12/11 in  $\mu\text{g/L}$ .

| Date     | c Chlorophyll <i>a</i> [ $\mu\text{g/L}$ ] | Date     | c Chlorophyll <i>a</i> [ $\mu\text{g/L}$ ] |
|----------|--------------------------------------------|----------|--------------------------------------------|
| 16/08/10 | 7.1                                        | 06/06/11 | 5.1                                        |
| 30/08/10 | 6.7                                        | 09/06/11 | 4.4                                        |
| 15/09/10 | 7.7                                        | 17/06/11 | 2.9                                        |
| 28/09/10 | 4.6                                        | 23/06/11 | 4.5                                        |
| 22/10/10 | 4.0                                        | 30/06/11 | 6.3                                        |
| 01/11/10 | 4.1                                        | 04/07/11 | 6.7                                        |
| 15/11/10 | 1.9                                        | 15/07/11 | 5.7                                        |
| 26/11/10 | 3.6                                        | 21/07/11 | 3.3                                        |
| 17/12/10 | 4.5                                        | 27/07/11 | 5.7                                        |
| 24/01/11 | 3.7                                        | 01/08/11 | 3.2                                        |
| 10/02/11 | 1.2                                        | 08/08/11 | 5.6                                        |
| 23/02/11 | 0.5                                        | 22/08/11 | 6.6                                        |
| 08/03/11 | 5.2                                        | 29/08/11 | 4.4                                        |
| 23/03/11 | 12.9                                       | 12/09/11 | 4.6                                        |
| 05/04/11 | 22.2                                       | 21/09/11 | 1.8                                        |
| 11/04/11 | 8.6                                        | 29/09/11 | 3.4                                        |
| 19/04/11 | 10.7                                       | 14/10/11 | 1.8                                        |
| 26/04/11 | 14.0                                       | 20/10/11 | 3.0                                        |
| 03/05/11 | 5.0                                        | 31/10/11 | 2.7                                        |
| 11/05/11 | 5.5                                        | 15/11/11 | 2.6                                        |
| 18/05/11 | 2.0                                        | 28/11/11 | 2.0                                        |
| 24/05/11 | 10.8                                       | 15/12/11 | 1.6                                        |
| 01/06/11 | 1.8                                        |          |                                            |

**Table S2:** Phytoplankton diversity and abundance. Abundance measured in cells/L.

| Dates    | cells/L [ $\times 10^6$ ] |     |    |    |   |             |     |             |   |         |   |   |   |     |            | Total |
|----------|---------------------------|-----|----|----|---|-------------|-----|-------------|---|---------|---|---|---|-----|------------|-------|
|          | cyanobacteria             |     |    |    |   | Cryptophyta |     | Chlorophyta |   | Diatoms |   |   |   |     | Haptophyta |       |
|          | A                         | B   | C  | D  | E | F           | G   | H           | I | J       | K | L | M | N   | O          |       |
| 08/09/10 | 6                         | 3   |    |    |   |             |     |             |   |         |   |   |   |     |            | 9     |
| 15/09/10 |                           |     | 3  |    |   |             |     |             |   |         |   |   |   |     |            | 3     |
| 23/09/10 |                           |     |    |    |   | 2           |     |             |   |         |   |   |   |     |            | 2     |
| 28/09/10 |                           | 1   |    |    |   |             |     | 1           |   |         |   |   |   |     |            | 2     |
| 08/10/10 |                           |     |    |    |   |             |     | 1           |   |         |   |   |   |     |            | 1     |
| 14/10/10 |                           |     | 42 |    |   |             |     |             |   |         |   |   |   |     |            | 42    |
| 22/10/10 |                           |     |    |    |   |             |     | 1           |   | 2       |   |   |   |     |            | 3     |
| 01/11/10 |                           | 1   |    |    |   |             |     |             |   |         |   |   |   |     |            | 1     |
| 15/11/10 |                           |     |    |    |   |             |     | 2           |   |         |   |   |   |     |            | 2     |
| 26/11/10 |                           |     |    |    |   |             |     | 2           | 2 |         |   |   |   |     |            | 4     |
| 17/12/10 |                           |     | 9  |    |   |             |     |             | 2 |         |   |   |   |     |            | 11    |
| 24/01/11 |                           |     | 3  | 13 |   |             |     |             | 2 |         |   |   |   |     |            | 18    |
| 10/02/11 |                           |     |    |    |   |             |     | 2           |   |         |   |   |   |     |            | 2     |
| 23/02/11 |                           |     | 1  |    |   |             |     |             |   |         |   |   |   |     |            | 1     |
| 08/03/11 |                           |     |    |    |   |             |     |             |   | 2       |   |   |   |     |            | 2     |
| 15/03/11 |                           |     |    |    |   |             |     |             |   | 2       |   |   |   |     |            | 2     |
| 23/03/11 |                           |     |    |    |   |             |     | 1           |   |         | 1 |   |   |     |            | 2     |
| 28/03/11 |                           |     |    |    |   |             |     |             |   | 2       | 1 |   |   |     |            | 3     |
| 05/04/11 |                           |     |    |    |   |             |     |             |   |         | 3 |   |   |     |            | 3     |
| 11/04/11 |                           |     |    |    |   | 0.5         |     |             |   |         |   |   |   |     |            | 0.5   |
| 19/04/11 |                           |     |    |    |   | 1           |     |             |   | 2       |   |   |   |     | 7          | 10    |
| 26/04/11 |                           |     |    |    |   |             |     |             |   |         |   | 9 |   |     | 21         | 30    |
| 03/05/11 |                           |     |    |    |   |             |     |             |   |         |   | 3 |   |     | 26         | 29    |
| 11/05/11 |                           |     |    |    |   |             |     |             |   |         |   |   | 2 |     | 13         | 15    |
| 18/05/11 |                           |     |    |    |   |             |     |             |   |         |   |   |   | 0.5 |            | 0.5   |
| 24/05/11 |                           |     |    |    |   |             |     |             |   | 2       | 3 |   |   |     |            | 5     |
| 06/06/11 |                           |     |    |    |   |             |     | 1           |   | 1       |   |   |   |     |            | 2     |
| 09/06/11 |                           |     |    |    |   |             | 0.5 | 1           |   |         |   |   |   |     |            | 1.5   |
| 17/06/11 |                           |     |    |    |   |             |     |             |   |         |   |   |   |     | 1          | 1     |
| 23/06/11 |                           |     |    |    |   |             |     |             |   |         |   |   |   |     | 1          | 1     |
| 30/06/11 |                           |     |    |    |   |             |     |             |   |         |   |   |   |     | 3          | 3     |
| 04/07/11 |                           | 0.5 |    |    |   |             |     |             |   |         |   |   |   |     |            | 0.5   |
| 15/07/11 |                           | 1   |    |    |   |             |     |             |   |         |   |   |   |     |            | 1     |
| 21/07/11 |                           |     |    |    |   |             |     |             |   |         | 1 |   |   |     |            | 1     |
| 27/07/11 | 6                         |     |    |    |   |             |     |             |   |         |   |   |   |     |            | 6     |
| 01/08/11 | 9                         |     |    |    |   |             |     |             |   | 2       |   |   |   |     |            | 11    |
| 08/08/11 |                           |     |    |    |   |             |     |             |   | 1       |   |   |   |     | 1          | 2     |
| 15/08/11 |                           |     |    |    |   |             |     |             |   |         |   |   |   |     | 1          | 1     |
| 22/08/11 |                           |     |    |    |   |             |     |             |   |         |   |   |   |     | 2          | 2     |
| 29/08/11 |                           |     |    |    |   | 0.5         |     |             |   |         |   |   |   |     |            | 0.5   |
| 12/09/11 |                           |     |    |    | 1 |             |     |             |   |         |   |   |   |     |            | 1     |
| 15/09/11 | 8                         |     |    |    |   |             |     |             |   |         |   |   |   |     |            | 8.2   |
| 21/09/11 |                           |     |    |    |   |             | 0.2 |             |   |         |   |   |   |     |            | 2     |
| 29/09/11 |                           |     |    |    |   | 1           |     |             |   | 1       |   |   |   |     |            | 2     |
| 14/10/11 |                           |     |    |    |   | 1           |     | 1           |   |         |   |   |   |     |            | 2     |
| 20/10/11 |                           |     |    |    |   |             |     |             |   |         |   |   |   |     | 2          | 2     |
| 31/10/11 |                           |     |    |    |   |             |     | 1           |   |         |   |   |   |     |            | 1     |
| 15/11/11 |                           | 3   |    |    |   |             |     |             |   |         |   |   |   |     |            | 3     |
| 28/11/11 |                           |     |    |    |   |             |     | 2           |   |         |   |   |   |     |            | 2     |
| 15/12/11 |                           |     |    |    |   |             |     | 2           |   | 1       |   |   |   |     |            | 3     |

Cyanobacteria: A *Chroococcaceae*, B *Chlorococcales*, C *Cyanophyta*, D *Snowella*, E *Microcystis*; Cryptophyta: F *Hemiselmis*, G *Plagioselmis*; Chlorophyta: H *Prasinophyceae*, I Chlorophyta; Diatoms: J *Bacillariales*, K *Thalassiosiraceae*, L *Chaetoceros*, M *Pseudo-nitzschia delicatissima*, N *Cylindrotheca closterium*; Haptophyta: O *Phaeocystis globosa*

**Table S3:** Order-level bacterial diversity and abundance in North Sea SPM based on the 16S rRNA gene amplicon sequencing. Percentage based on total bacteria reads excluding Chloroplast reads.

| bacterial groups          | % of total bacteria reads |           |                |           |           |           |           |           |           |           |           |           |           |           |           |                |
|---------------------------|---------------------------|-----------|----------------|-----------|-----------|-----------|-----------|-----------|-----------|-----------|-----------|-----------|-----------|-----------|-----------|----------------|
|                           | 28/09/<br>2010            | 26/1<br>1 | 10/01/<br>2011 | 08/0<br>3 | 23/0<br>3 | 05/0<br>4 | 19/0<br>4 | 03/0<br>5 | 18/0<br>5 | 17/0<br>6 | 30/0<br>6 | 15/0<br>7 | 22/0<br>8 | 06/0<br>9 | 21/0<br>9 | 28/10/<br>2011 |
| <i>Acidimicrobiales</i>   | 1.7                       | 3.4       | 1.1            | 1.1       | 0.8       | 0.2       | 0.3       | 0.5       | 1.2       | 3.3       | 2.4       | 1.4       | 4.7       | 4.6       | 10.8      | 6.7            |
| <i>Micrococcales</i>      | 3.2                       | 1.7       | 1.1            | 0.2       | 0.1       | 0.6       | 0.8       | 1.1       | 6.1       | 2.6       | 2.4       | 2.0       | 5.8       | 1.2       | 0.3       | 0.2            |
| <i>Flavobacteriales</i>   | 16.2                      | 13.2      | 10.6           | 16.8      | 14.7      | 27.9      | 29.7      | 30.8      | 28.6      | 25.3      | 27.8      | 22.1      | 21.0      | 17.3      | 14.2      | 13.4           |
| <i>Sphingobacteriales</i> | 3.4                       | 2.7       | 4.6            | 4.6       | 4.5       | 3.9       | 3.6       | 3.3       | 3.2       | 4.1       | 3.8       | 3.1       | 3.5       | 2.7       | 2.7       | 2.9            |
| <i>Pirellulales</i>       | 8.1                       | 2.9       | 2.9            | 3.1       | 2.6       | 0.6       | 0.1       | 0.3       | 0.1       | 0.3       | 0.4       | 1.0       | 1.8       | 2.1       | 3.4       | 2.7            |
| <i>Rhodobacterales</i>    | 8.2                       | 12.4      | 9.7            | 9.2       | 8.4       | 5.6       | 6.5       | 5.9       | 9.1       | 11.2      | 9.1       | 5.8       | 9.1       | 10.0      | 11.6      | 6.4            |
| <i>Rickettsiales</i>      | 8.4                       | 12.2      | 12.0           | 6.1       | 8.7       | 16.8      | 15.5      | 7.0       | 5.5       | 2.6       | 3.2       | 6.0       | 7.6       | 5.6       | 7.5       | 9.9            |
| <i>Methylophiales</i>     | 0.9                       | 1.8       | 2.5            | 1.9       | 1.0       | 1.0       | 1.2       | 0.7       | 1.7       | 1.0       | 2.3       | 2.4       | 2.0       | 1.7       | 1.6       | 4.0            |
| <i>Rhodocyclales</i>      | 0.9                       | 2.1       | 6.5            | 5.1       | 3.7       | 2.1       | 3.9       | 2.5       | 1.3       | 0.4       | 0.7       | 1.4       | 1.1       | 0.5       | 0.1       | 0.9            |
| <i>Alteromonadales</i>    | 10.7                      | 9.3       | 13.2           | 11.8      | 12.7      | 8.8       | 11.6      | 17.0      | 9.7       | 17.3      | 13.1      | 14.1      | 10.0      | 12.0      | 8.9       | 11.1           |
| <i>Oceanospirillales</i>  | 3.0                       | 7.9       | 4.3            | 5.1       | 7.3       | 7.4       | 12.0      | 7.8       | 10.5      | 7.1       | 8.1       | 6.5       | 6.6       | 7.2       | 8.7       | 8.4            |
| <i>Thiotrichales</i>      | 3.1                       | 1.6       | 2.9            | 1.6       | 2.4       | 1.2       | 0.4       | 3.8       | 1.6       | 1.7       | 3.2       | 2.6       | 3.1       | 3.4       | 1.4       | 2.5            |
| <i>Puniceococcales</i>    | 0.6                       | 1.0       | 0.3            | 1.9       | 5.4       | 8.5       | 3.4       | 1.3       | 0.9       | 0.4       | 5.6       | 2.6       | 3.5       | 1.4       | 0.9       | 0.7            |
| <i>Verrucomicrobiales</i> | 5.1                       | 1.0       | 1.1            | 2.9       | 4.5       | 2.3       | 0.7       | 1.7       | 2.3       | 3.2       | 2.8       | 3.7       | 3.3       | 1.3       | 0.8       | 1.0            |

*Actinobacteria: Acidimicrobiales, Micrococcales; Bacteroidetes: Flavobacteriales, Sphingobacteriales; Planctomycetes: Pirellulales;  $\alpha$ -Proteobacteria: Rhodobacterales, Rickettsiales;  $\beta$ -Proteobacteria: Methylophiales, Rhodocyclales;  $\gamma$ -Proteobacteria: Alteromonadales, Oceanospirillales, Thiotrichales; Verrucomicrobia: Puniceococcales, Verrucomicrobiales*

**Table S4:** Fatty acid abundance in North Sea water samples.

| Date     | Fatty acid abundance [%] |        |       |       |       |            |
|----------|--------------------------|--------|-------|-------|-------|------------|
|          | C14:0                    | C16:1* | C16:0 | C18:x | C18:0 | C20:5 PUFA |
| 16/08/10 | 14                       | 23     | 36    | 16    | 6     | 5          |
| 30/08/10 | 17                       | 26     | 29    | 15    | 6     | 7          |
| 15/09/10 | 19                       | 27     | 32    | 14    | 5     | 4          |
| 28/09/10 | 14                       | 24     | 29    | 18    | 9     | 7          |
| 15/11/10 | 13                       | 17     | 32    | 23    | 13    | 3          |
| 26/11/10 | 13                       | 20     | 31    | 21    | 13    | 2          |
| 10/12/10 | 12                       | 13     | 35    | 28    | 11    | 1          |
| 17/12/10 | 11                       | 30     | 28    | 26    | 4     | 0          |
| 10/01/11 | 9                        | 27     | 32    | 23    | 8     | 0          |
| 24/01/11 | 7                        | 23     | 29    | 30    | 7     | 4          |
| 17/02/11 | 8                        | 27     | 31    | 24    | 9     | 0          |
| 08/03/11 | 11                       | 35     | 24    | 16    | 3     | 11         |
| 23/03/11 | 13                       | 33     | 21    | 17    | 5     | 12         |
| 05/04/11 | 10                       | 34     | 26    | 13    | 4     | 13         |
| 19/04/11 | 13                       | 35     | 25    | 11    | 2     | 14         |
| 03/05/11 | 17                       | 23     | 23    | 22    | 2     | 12         |
| 18/05/11 | 17                       | 28     | 29    | 12    | 6     | 9          |
| 17/06/11 | 21                       | 21     | 35    | 9     | 10    | 4          |
| 30/06/11 | 27                       | 20     | 26    | 14    | 5     | 8          |
| 15/07/11 | 21                       | 25     | 28    | 9     | 7     | 10         |
| 27/07/11 | 16                       | 25     | 33    | 11    | 10    | 5          |
| 08/08/11 | 14                       | 25     | 26    | 10    | 7     | 18         |
| 22/08/11 | 21                       | 15     | 31    | 17    | 8     | 7          |
| 06/09/11 | 14                       | 20     | 32    | 10    | 18    | 6          |
| 21/09/11 | 13                       | 16     | 38    | 20    | 10    | 3          |
| 11/10/11 | 16                       | 22     | 37    | 13    | 11    | 0          |
| 28/10/11 | 12                       | 21     | 32    | 22    | 9     | 5          |
| 15/11/11 | 12                       | 25     | 31    | 17    | 8     | 6          |
| 28/11/11 | 15                       | 26     | 32    | 15    | 7     | 5          |
| 16/12/11 | 8                        | 27     | 30    | 19    | 9     | 6          |

*n*C16:1\*: double bond at the  $\omega$ 7 position

**Table S5:**  $\delta D$  values of fatty acids.

| Date     | $\delta D_{\text{fatty acid}}$ [‰] |        |       |       |            |
|----------|------------------------------------|--------|-------|-------|------------|
|          | C14:0                              | C16:1* | C16:0 | C18:0 | C20:5 PUFA |
| 16/08/10 | -219                               | -201   | -201  | -185  | -191       |
| 30/08/10 | -222                               | -202   | -189  | -186  | -199       |
| 15/09/10 | -216                               | -206   | -197  | -186  | -180       |
| 28/09/10 | -219                               | -198   | -192  | -197  | -207       |
| 15/11/10 | -213                               | -203   | -182  | -200  | N.D.       |
| 26/11/10 | -226                               | -202   | -188  | -203  | N.D.       |
| 10/12/10 | -225                               | -188   | -191  | -202  | N.D.       |
| 17/12/10 | -232                               | -193   | -194  | -188  | N.D.       |
| 10/01/11 | -221                               | -200   | -186  | -204  | N.D.       |
| 24/01/11 | -212                               | -191   | -195  | -192  | -209       |
| 17/02/11 | -223                               | -208   | -195  | -206  | N.D.       |
| 08/03/11 | -226                               | -214   | -205  | -182  | -235       |
| 23/03/11 | -241                               | -216   | -205  | -190  | -241       |
| 05/04/11 | -223                               | -210   | -209  | -212  | -223       |
| 19/04/11 | -235                               | -224   | -221  | N.D.  | -240       |
| 03/05/11 | -238                               | -225   | -214  | -212  | -236       |
| 18/05/11 | -219                               | -205   | -198  | -178  | -214       |
| 17/06/11 | -225                               | -211   | -196  | -190  | N.D.       |
| 30/06/11 | -225                               | -210   | -202  | -175  | -213       |
| 15/07/11 | -204                               | -195   | -188  | -181  | -217       |
| 27/07/11 | -220                               | -200   | -203  | -180  | -201       |
| 08/08/11 | -222                               | -202   | -201  | -180  | -234       |
| 22/08/11 | -231                               | -202   | -189  | -190  | -202       |
| 06/09/11 | -224                               | -217   | -221  | -216  | -218       |
| 21/09/11 | -218                               | -204   | -185  | -194  | N.D.       |
| 11/10/11 | -213                               | -191   | -183  | -188  | -226       |
| 28/10/11 | -217                               | -187   | -181  | -184  | -207       |
| 15/11/11 | -212                               | -198   | -191  | -184  | -221       |
| 28/11/11 | -217                               | -193   | -190  | -180  | -197       |
| 16/12/11 | -198                               | -179   | -174  | -188  | N.D.       |

*n*C16:1\*: double bond at the  $\omega$ 7 position

**Table S6:** Fatty acid profiles of the bacterio- and phytoplankton observed via 16S rRNA gene amplicon sequencing and microscopy.

| Organism                  | Fatty acid profile                                                                                                                                                                                                                   | Literature                                                                                                            |
|---------------------------|--------------------------------------------------------------------------------------------------------------------------------------------------------------------------------------------------------------------------------------|-----------------------------------------------------------------------------------------------------------------------|
| <i>Acidimicrobiales</i>   | OCS155: uncultured<br><i>Microthrixaceae</i> : fatty acid profile not determined                                                                                                                                                     |                                                                                                                       |
| <i>Micrococcales</i>      | <i>Microbacteriaceae</i> : mainly <i>ai</i> C15:0, <i>i</i> C16:0, <i>a</i> C17:0                                                                                                                                                    | (Evtushenko and Takeuchi, 2006)                                                                                       |
| <i>Flavobacteriales</i>   | <i>Flavobacteriaceae</i> : mainly <i>i</i> C15:0, <i>ai</i> C15:0, C15:0; only traces of C16:0, C18:0, C14:0<br><i>Cryomorphaceae</i> : mainly <i>i</i> C15:0, <i>i</i> C15:1 $\omega$ 10, C15:0; only traces of C16:0, C18:0, C14:0 | (Van Trappen et al., 2004b; Khan et al., 2006; Heindl et al., 2008)<br>(Bowman et al., 2003; O'Sullivan et al., 2005) |
| <i>Sphingobacteriales</i> | <i>Sphingobacteriaceae</i> : mainly <i>i</i> C15:0, <i>i</i> C17:0 3-OH, <i>i</i> C17:1 $\omega$ 9 and potentially C16:1 $\omega$ 7; minor amounts of C16:0 and C14:0<br>NS11-12: uncultured                                         | (Gallego et al., 2006)                                                                                                |
| <i>Pirellulales</i>       | <i>Pirellulaceae</i> : mainly C16:0, C18:1 $\omega$ 9; minor amounts of C14:0, C16:1 $\omega$ 7 and C18:0                                                                                                                            | (Kerger et al., 1988; Schlesner et al., 2004)                                                                         |
| <i>Rhodobacterales</i>    | <i>Rhodobacteraceae</i> : mainly C18:1 $\omega$ 7, C16:0, C16:1 $\omega$ 7, C18:0                                                                                                                                                    | (Yoon et al., 2007a; Venkata Ramana et al., 2009; Jung et al., 2010; Park and Yoon, 2014)                             |
| <i>Rickettsiales</i>      | SAR11 cluster: fatty acid profile not determined                                                                                                                                                                                     |                                                                                                                       |
| <i>Methylophiales</i>     | <i>Methylophilaceae</i> : mainly C16:0 and C16:1 $\omega$ 7; traces of C18:0                                                                                                                                                         | (Kalyuzhnaya et al., 2006; Kalyuzhnaya et al., 2012)                                                                  |
| <i>Rhodocyclales</i>      | <i>Rhodocyclaceae</i> : mainly C16:0, C16:1 <i>cis</i> -9, C18:1; only traces of C14:0 and C18:0                                                                                                                                     | (Reinhold-Hurek et al., 1993; Anders et al., 1995)                                                                    |

|                                   |                                                                                                                                                                                                                                                                                |                                                                                                                                                                |
|-----------------------------------|--------------------------------------------------------------------------------------------------------------------------------------------------------------------------------------------------------------------------------------------------------------------------------|----------------------------------------------------------------------------------------------------------------------------------------------------------------|
| <i>Alteromonadales</i>            | <i>Alteromonadaceae</i> : mainly C18:1 $\omega$ 7, C16:0, C16:1 $\omega$ 7; only traces of C14:0 and C18:0<br>SAR92 clade: fatty acid profile not determined<br>OM60 clade: mainly C16:0, C16:1 $\omega$ 7, C16:1 $\omega$ 6, C18:1 $\omega$ 7; only traces of C14:0 and C18:0 | (Bowman et al., 1998; Van Trappen et al., 2004a; Tang et al., 2008; Lee et al., 2012; Teramoto and Nishijima, 2014) (Spring et al., 2009; Spring et al., 2013) |
| <i>Oceanospirillales</i>          | <i>Halomonadaceae</i> : mainly C16:0, C18:1 $\omega$ 7; minor amounts of C14:0, C16:1 $\omega$ 7; traces of C18:0                                                                                                                                                              | (Sánchez-Porro et al., 2009; Long et al., 2013)                                                                                                                |
| <i>Thiotrichales</i>              | <i>Piscirickettsiaceae</i> : mainly C16:0, C16:1 $\omega$ 7; minor amounts of C14:0; traces of C18:0<br><i>Thiotrichaceae</i> : mainly C18:1 $\omega$ 7, C16:1 $\omega$ 7, C16:0; minor amounts of C14:0, C18:0                                                                | (Doronina et al., 2003; Kim et al., 2007; Antony et al., 2012) (Aruga et al., 2002)                                                                            |
| <i>Puniceococcales</i>            | <i>Coraliomargarita</i> : mainly C14:0, C18:1 $\omega$ 9, C18:0                                                                                                                                                                                                                | (Yoon et al., 2007b)                                                                                                                                           |
| <i>Verrucomicrobiales</i>         | <i>Verrucomicrobiaceae</i> : mainly C16:0, some also C14:0 and C16:1 $\omega$ 7                                                                                                                                                                                                | (Yoon et al., 2008)                                                                                                                                            |
| <i>Chlorophyta</i>                | <i>Mamiellales</i> : mainly C16:0, C16:1 $\omega$ 7, C18:1 $\omega$ 7, C18:1 $\omega$ 9; only traces of C14:0 and C18:0                                                                                                                                                        | (Martínez-Fernández et al., 2006; Vaezi et al., 2013)                                                                                                          |
| <i>Stramenopiles</i><br>(diatoms) | <i>Thalassiosira</i> : mainly C14:0, C16:0, C16:1 $\omega$ 7; only minor amounts of C18:0<br><i>Chaetoceros</i> : mainly C14:0, C16:0, C16:1 $\omega$ 7, C20:5; only minor amounts of C18:0                                                                                    | (Viso and Marty, 1993) (Viso and Marty, 1993; Zhukova and Aizdaicher, 1995)                                                                                    |



|                    |                                                                                                                                                                                            |
|--------------------|--------------------------------------------------------------------------------------------------------------------------------------------------------------------------------------------|
| <i>Haptophyta</i>  | <i>Phaeocystis</i> : mainly C14:0, (Al-Hasan et al., 1990; C16:0, C18:1 $\omega$ 9; minor Nichols et al., 1991; amounts of C16:1 $\omega$ 7, C18:0 Hamm and Rousseau, and C20:5 PUFA 2003) |
| <i>Cryptophyta</i> | <i>Chroomonas</i> : mainly C16:0, (Viso and Marty, 1993; C18:1 $\omega$ 9, C20:5 PUFA; only Zhukova and minor amount of C14:0, Aizdaicher, 1995) C16:1 $\omega$ 7 and C18:0                |

---

Al-Hasan, R. H., Ali, A. M., and Radwan, S. S.: Lipids, and their constituent fatty acids, of *Phaeocystis* sp. from the Arabian Gulf, Mar Biol, 105, 9-14, 10.1007/bf01344265, 1990.

Anders, H.-J., Kaetzke, A., Kämpfer, P., Ludwig, W., and Fuchs, G.: Taxonomic position of aromatic-degrading denitrifying Pseudomonad strains K 172 and KB 740 and their description as new members of the genera *Thauera*, as *Thauera aromatica* sp. nov., and *Azoarcus*, as *Azoarcus evansii* sp. nov., respectively, members of the Beta subclass of the *Proteobacteria*, Int J Syst Bacteriol, 45, 327-333, 10.1099/00207713-45-2-327, 1995.

Antony, C. P., Doronina, N. V., Boden, R., Trotsenko, Y. A., Shouche, Y. S., and Murrell, J. C.: *Methylophaga lonarensis* sp. nov., a moderately haloalkaliphilic methylotroph isolated from the soda lake sediments of a meteorite impact crater, Int J Syst Evol Microbiol, 62, 1613-1618, 10.1099/ijms.0.035089-0, 2012.

Aruga, S., Kamagata, Y., Kohno, T., Hanada, S., Nakamura, K., and Kanagawa, T.: Characterization of filamentous Eikelboom type 021N bacteria and description of *Thiothrix disciformis* sp. nov. and *Thiothrix flexilis* sp. nov, Int J Syst Evol Microbiol, 52, 1309-1316, 10.1099/ijms.0.02177-0, 2002.

Bowman, J. P., McCammon, S. A., Brown, J. L., and McMeekin, T. A.: *Glacielecola punicea* gen. nov., sp. nov. and *Glacielecola pallidula* gen. nov., sp. nov.: psychrophilic bacteria from Antarctic sea-ice habitats, Int J Syst Bacteriol, 48, 1213-1222, 10.1099/00207713-48-4-1213, 1998.

Bowman, J. P., Nichols, C. M., and Gibson, J. A. E.: *Algoriphagus ratkowskyi* gen. nov., sp. nov., *Brumimicrobium glaciale* gen. nov., sp. nov., *Cryomorpha ignava* gen. nov., sp. nov. and *Crocinitomix catalasitica* gen. nov., sp. nov., novel flavobacteria isolated from various polar habitats, Int J Syst Evol Microbiol, 53, 1343-1355, 10.1099/ijms.0.02553-0, 2003.

Doronina, N., Darmaeva, T., and Trotsenko, Y.: *Methylophaga natronica* sp. nov., a new alkaliphilic and moderately halophilic, restricted-facultatively methylotrophic bacterium from soda lake of the Southern Transbaikal Region, Syst Appl Microbiol, 26, 382-389, 10.1078/072320203322497419, 2003.

Evtushenko, L., and Takeuchi, M.: The Family *Microbacteriaceae*, in: The Prokaryotes, edited by: Dworkin, M., Falkow, S., Rosenberg, E., Schleifer, K.-H., and Stackebrandt, E., Springer New York, 1020-1098, 2006.

Gallego, V., García, M. T., and Ventosa, A.: *Pedobacter aquatilis* sp. nov., isolated from drinking water, and emended description of the genus *Pedobacter*, Int J Syst Evol Microbiol, 56, 1853-1858, 10.1099/ijs.0.64176-0, 2006.

Hamm, C. E., and Rousseau, V.: Composition, assimilation and degradation of Phaeocystis globosa-derived fatty acids in the North Sea, J Sea Res, 50, 271-283, 10.1016/s1385-1101(03)00044-3, 2003.

Heindl, H., Wiese, J., and Imhoff, J. F.: *Tenacibaculum adriaticum* sp. nov., from a bryozoan in the Adriatic Sea, Int J Syst Evol Microbiol, 58, 542-547, 10.1099/ijs.0.65383-0, 2008.

Jung, Y.-T., Kim, B.-H., Oh, T.-K., and Yoon, J.-H.: *Pseudoruegeria lutimaris* sp. nov., isolated from a tidal flat sediment, and emended description of the genus *Pseudoruegeria*, Int J Syst Evol Microbiol, 60, 1177-1181, 10.1099/ijs.0.015073-0, 2010.

Kalyuzhnaya, M. G., Bowerman, S., Lara, J. C., Lidstrom, M. E., and Chistoserdova, L.: *Methylotenera mobilis* gen. nov., sp. nov., an obligately methylamine-utilizing bacterium within the family *Methylophilaceae*, Int J Syst Evol Microbiol, 56, 2819-2823, 10.1099/ijs.0.64191-0, 2006.

Kalyuzhnaya, M. G., Beck, D. A. C., Vorobev, A., Smalley, N., Kunkel, D. D., Lidstrom, M. E., and Chistoserdova, L.: Novel methylotrophic isolates from lake sediment, description of *Methylotenera versatilis* sp. nov. and emended description of the genus *Methylotenera*, Int J Syst Evol Microbiol, 62, 106-111, 10.1099/ijs.0.029165-0, 2012.

Kerger, B. D., Mancuso, C. A., Nichols, P. D., White, D. C., Langworthy, T., Sittig, M., Schlesner, H., and Hirsch, P.: The budding bacteria, *Pirellula* and *Planctomyces*, with atypical 16S rRNA and absence of peptidoglycan, show eubacterial phospholipids and uniquely high proportions of long chain beta-hydroxy fatty acids in the lipopolysaccharide lipid A, Arch Microbiol, 149, 255-260, 10.1007/bf00422014, 1988.

Khan, S. T., Nakagawa, Y., and Harayama, S.: *Sedimicola luteus* gen. nov., sp. nov., a novel member of the family *Flavobacteriaceae*, Int J Syst Evol Microbiol, 56, 841-845, 10.1099/ijs.0.64047-0, 2006.

Kim, H. G., Doronina, N. V., Trotsenko, Y. A., and Kim, S. W.: *Methylophaga aminisulfdivorans* sp. nov., a restricted facultatively methylotrophic marine bacterium, Int J Syst Evol Microbiol, 57, 2096-2101, 10.1099/ijs.0.65139-0, 2007.

Lee, O. O., Lai, P. Y., Wu, H.-x., Zhou, X.-j., Miao, L., Wang, H., and Qian, P.-Y.: *Marinobacter xestospongiae* sp. nov., isolated from the marine sponge *Xestospongia testudinaria* collected from the Red Sea, *Int J Syst Evol Microbiol*, 62, 1980-1985, 10.1099/ijms.0.028811-0, 2012.

Long, M.-R., Zhang, D.-F., Yang, X.-Y., Zhang, X.-M., Zhang, Y.-G., Zhang, Y.-M., Zhu, H., and Li, W.-J.: *Halomonas nanhaiensis* sp. nov., a halophilic bacterium isolated from a sediment sample from the South China Sea, *Antonie van Leeuwenhoek*, 103, 997-1005, 10.1007/s10482-013-9879-3, 2013.

sequence data, *Nucleic Acids Res*, 32, 1363-1371, 10.1093/nar/gkh293, 2004.

Martínez-Fernández, E., Acosta-Salmón, H., and Southgate, P. C.: The nutritional value of seven species of tropical microalgae for black-lip pearl oyster (*Pinctada margaritifera*, L.) larvae, *Aquaculture*, 257, 491-503, 10.1016/j.aquaculture.2006.03.022, 2006.

Nichols, P. D., Skerratt, J. H., Davidson, A., Burton, H., and McMeekin, T. A.: Lipids of cultured *Phaeocystis pouchetii*: Signatures for food-web, biogeochemical and environmental studies in Antarctica and the Southern ocean, *Phytochemistry*, 30, 3209-3214, 10.1016/0031-9422(91)83177-M, 1991.

O'Sullivan, L. A., Rinna, J., Humphreys, G., Weightman, A. J., and Fry, J. C.: *Fluviicola taffensis* gen. nov., sp. nov., a novel freshwater bacterium of the family *Cryomorphaceae* in the phylum 'Bacteroidetes', *Int J Syst Evol Microbiol*, 55, 2189-2194, 10.1099/ijms.0.63736-0, 2005.

Park, S., and Yoon, J. H.: *Octadecabacter jejudonensis* sp nov., isolated from the junction between the ocean and a freshwater spring and emended description of the genus *Octadecabacter*, *Int J Syst Evol Microbiol*, 64, 719-724, 10.1099/ijms.0.057513-0, 2014.

Reinhold-Hurek, B., Hurek, T., Gillis, M., Hoste, B., Vancanneyt, M., Kersters, K., and De Ley, J.: *Azoarcus* gen. nov., nitrogen-fixing *Proteobacteria* associated with roots of Kallar grass (*Leptochloa fusca* (L.) Kunth), and description of two species, *Azoarcus indigenus* sp. nov. and *Azoarcus communis* sp. nov, *Int J Syst Bacteriol*, 43, 574-584, 10.1099/00207713-43-3-574, 1993.

Sánchez-Porro, C., de la Haba, R. R., Soto-Ramírez, N., Márquez, M. C., Montalvo-Rodríguez, R., and Ventosa, A.: Description of *Kushneria aurantia* gen. nov., sp. nov., a novel member of the family *Halomonadaceae*, and a proposal for reclassification of *Halomonas marisflavi* as *Kushneria marisflavi* comb. nov., of *Halomonas indalinina* as *Kushneria indalinina* comb. nov. and of *Halomonas avicenniae* as *Kushneria avicenniae* comb. nov, *Int J Syst Evol Microbiol*, 59, 397-405, 10.1099/ijms.0.001461-0, 2009.

Schlesner, H., Rensmann, C., Tindall, B. J., Gade, D., Rabus, R., Pfeiffer, S., and Hirsch, P.: Taxonomic heterogeneity within the *Planctomycetales* as derived by DNA–DNA hybridization, description of *Rhodopirellula baltica* gen. nov., sp. nov., transfer of *Pirellula marina* to the genus

*Blastopirellula* gen. nov. as *Blastopirellula marina* comb. nov. and emended description of the genus *Pirellula*, Int J Syst Evol Microbiol, 54, 1567-1580, 10.1099/ijms.0.63113-0, 2004.

Tang, S.-K., Wang, Y., Cai, M., Lou, K., Mao, P.-H., Jin, X., Jiang, C.-L., Xu, L.-H., and Li, W.-J.: *Microbulbifer halophilus* sp. nov., a moderately halophilic bacterium from north-west China, Int J Syst Evol Microbiol, 58, 2036-2040, 10.1099/ijms.0.65519-0, 2008.

Teramoto, M., and Nishijima, M.: *Agaribacter marinus* gen. nov., sp. nov., an agar-degrading bacterium from surface seawater, Int J Syst Evol Microbiol, 64, 2416-2423, 10.1099/ijms.0.061150-0, 2014.

Van Trappen, S., Tan, T.-L., Yang, J., Mergaert, J., and Swings, J.: *Alteromonas stellipolaris* sp. nov., a novel, budding, prosthecate bacterium from Antarctic seas, and emended description of the genus *Alteromonas*, Int J Syst Evol Microbiol, 54, 1157-1163, 10.1099/ijms.0.02862-0, 2004a.

Van Trappen, S., Vandecandelaere, I., Mergaert, J., and Swings, J.: *Flavobacterium degerlachei* sp. nov., *Flavobacterium frigoris* sp. nov. and *Flavobacterium micromati* sp. nov., novel psychrophilic bacteria isolated from microbial mats in Antarctic lakes, Int J Syst Evol Microbiol, 54, 85-92, 10.1099/ijms.0.02857-0, 2004b.

Venkata Ramana, V., Anil Kumar, P., Srinivas, T. N. R., Sasikala, C., and Ramana, C. V.: *Rhodobacter aestuarii* sp. nov., a phototrophic alphaproteobacterium isolated from an estuarine environment, Int J Syst Evol Microbiol, 59, 1133-1136, 10.1099/ijms.0.004507-0, 2009.

Viso, A.-C., and Marty, J.-C.: Fatty acids from 28 marine microalgae, Phytochemistry, 34, 1521-1533, 10.1016/S0031-9422(00)90839-2, 1993.

Yoon, J.-H., Lee, S.-Y., Kang, S.-J., Lee, C.-H., and Oh, T.-K.: *Pseudoruegeria aquimaris* gen. nov., sp. nov., isolated from seawater of the East Sea in Korea, Int J Syst Evol Microbiol, 57, 542-547, 10.1099/ijms.0.64594-0, 2007a.

Yoon, J., Yasumoto-Hirose, M., Katsuta, A., Sekiguchi, H., Matsuda, S., Kasai, H., and Yokota, A.: *Coralimargarita akajimensis* gen. nov., sp. nov., a novel member of the phylum 'Verrucomicrobia' isolated from seawater in Japan, Int J Syst Evol Microbiol, 57, 959-963, 10.1099/ijms.0.64755-0, 2007b.

Yoon, J., Matsuo, Y., Katsuta, A., Jang, J.-H., Matsuda, S., Adachi, K., Kasai, H., and Yokota, A.: *Haloferula rosea* gen. nov., sp. nov., *Haloferula harenae* sp. nov., *Haloferula phyci* sp. nov., *Haloferula helveola* sp. nov. and *Haloferula sargassicola* sp. nov., five marine representatives of the family *Verrucomicrobiaceae* within the phylum 'Verrucomicrobia', Int J Syst Evol Microbiol, 58, 2491-2500, 10.1099/ijms.0.2008/000711-0, 2008.

Zhukova, N. V., and Aizdaicher, N. A.: Fatty acid composition of 15 species of marine microalgae, Phytochemistry, 39, 351-356, 10.1016/0031-9422(94)00913-E, 1995.

## Figure legends Supplementary

### Figure S1

Phylogenetic tree of 16S rRNA gene sequence reads assigned to *Bacteroidetes*. Scale bar indicates 0.10 % estimated sequence divergence. Groups containing sequences are highlighted.

### Figure S2

Phylogenetic tree of 16S rRNA gene sequence reads assigned to *Alphaproteobacteria*. Scale bar indicates 0.10 % estimated sequence divergence. Groups containing sequences are highlighted.

### Figure S3

Phylogenetic tree of 16S rRNA gene sequence reads assigned to *Gammaproteobacteria*. Scale bar indicates 0.10 % estimated sequence divergence. Groups containing sequences are highlighted.

### Figure S4

$\delta D_{\text{water}}$  versus salinity of North Sea SPM sampled in 2013.

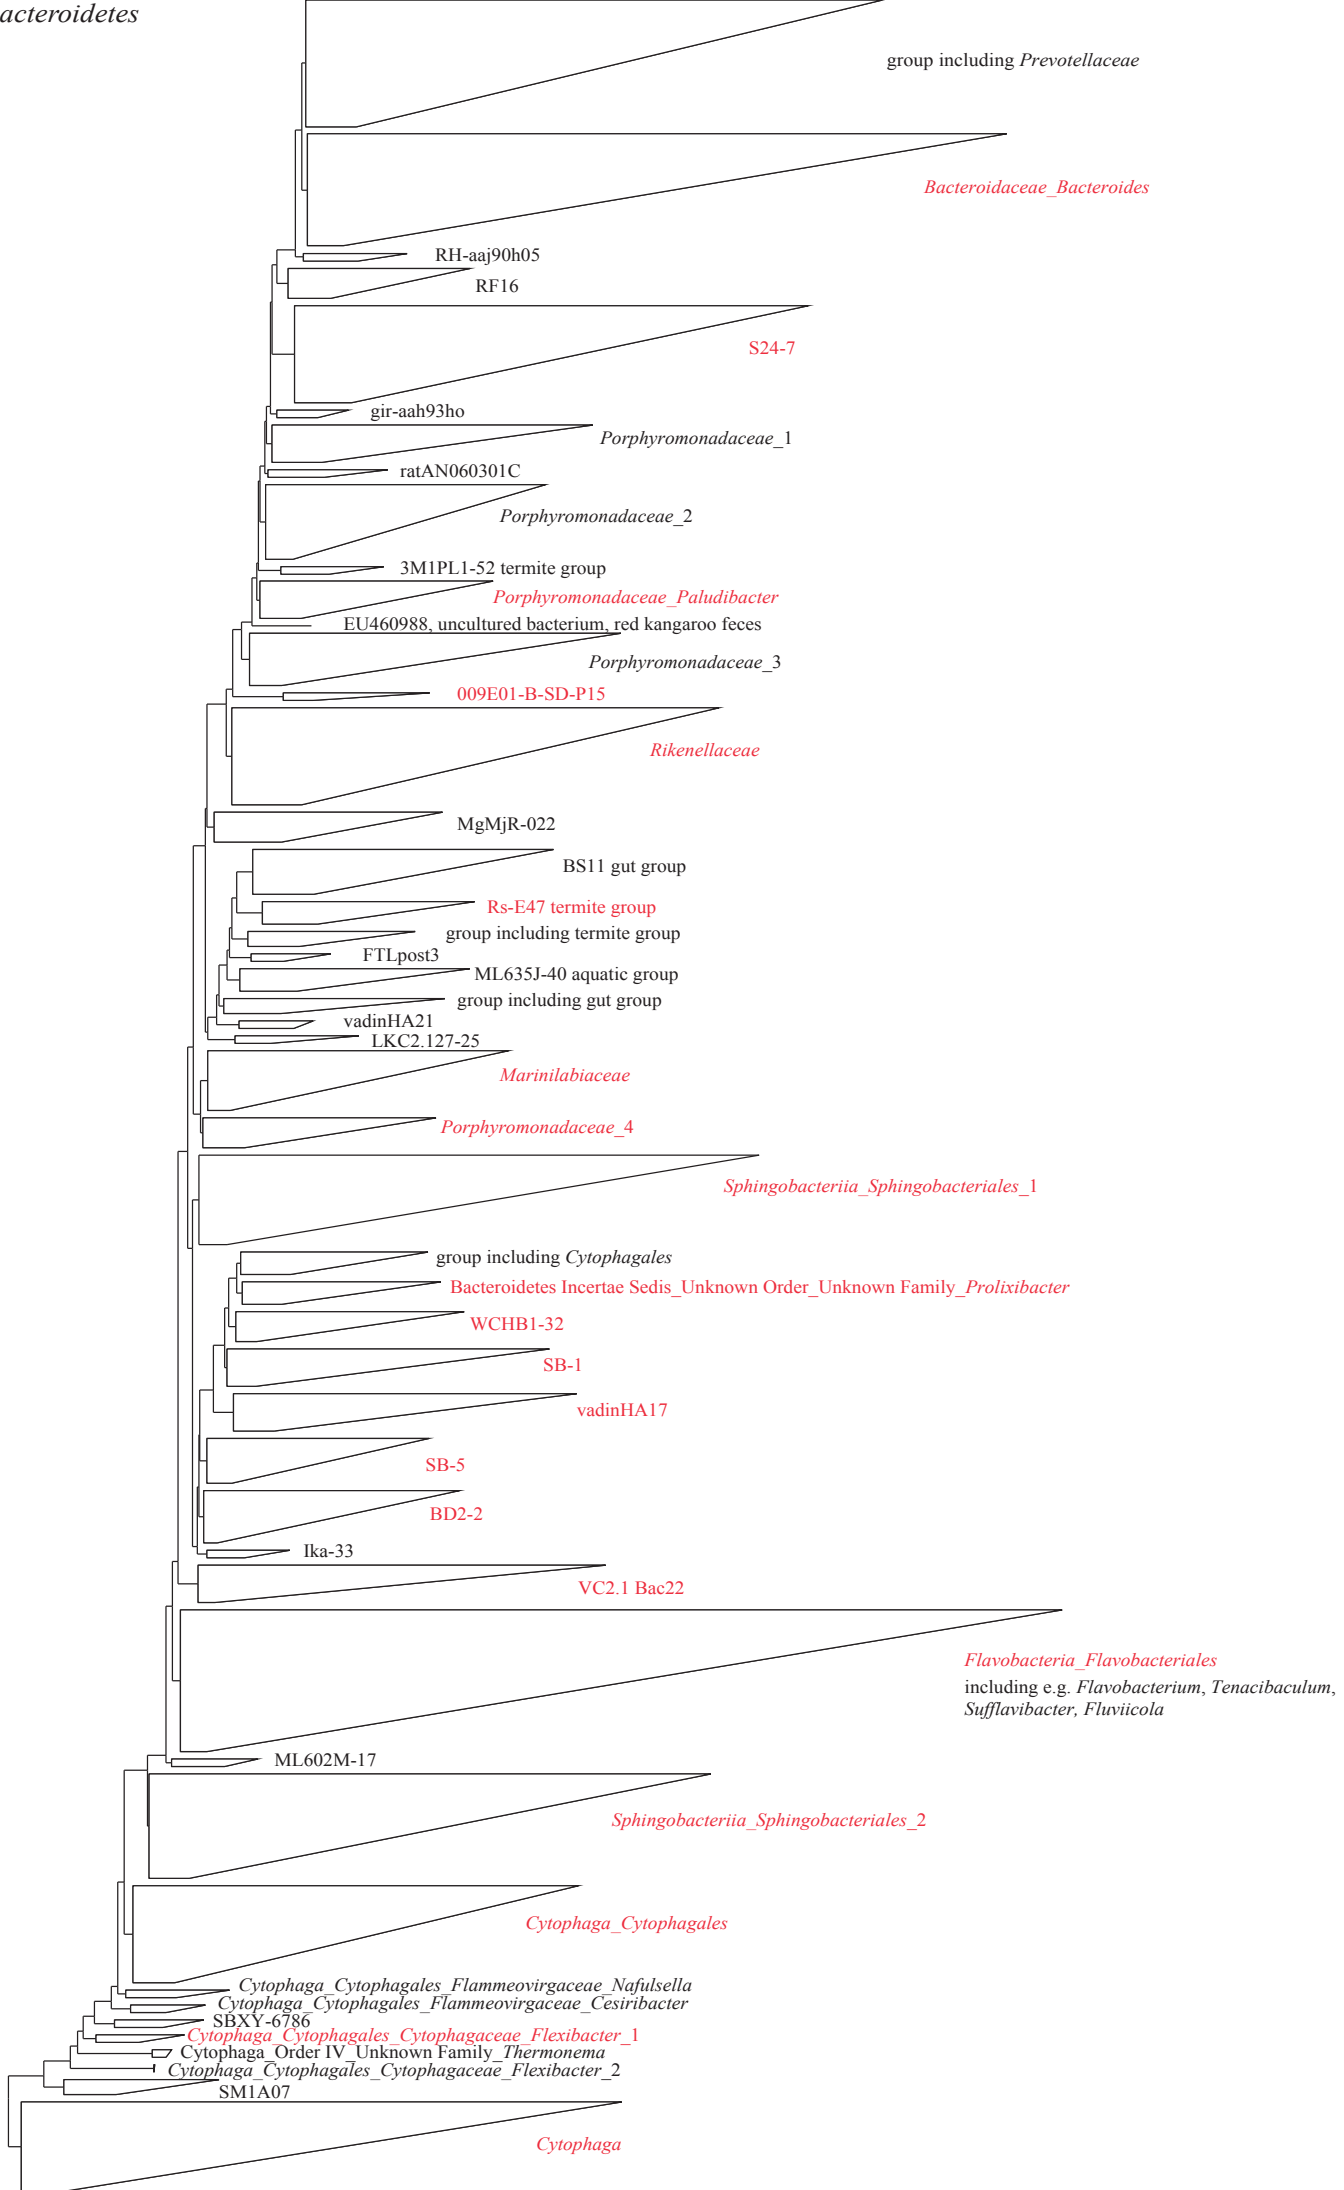

Alphaproteobacteria

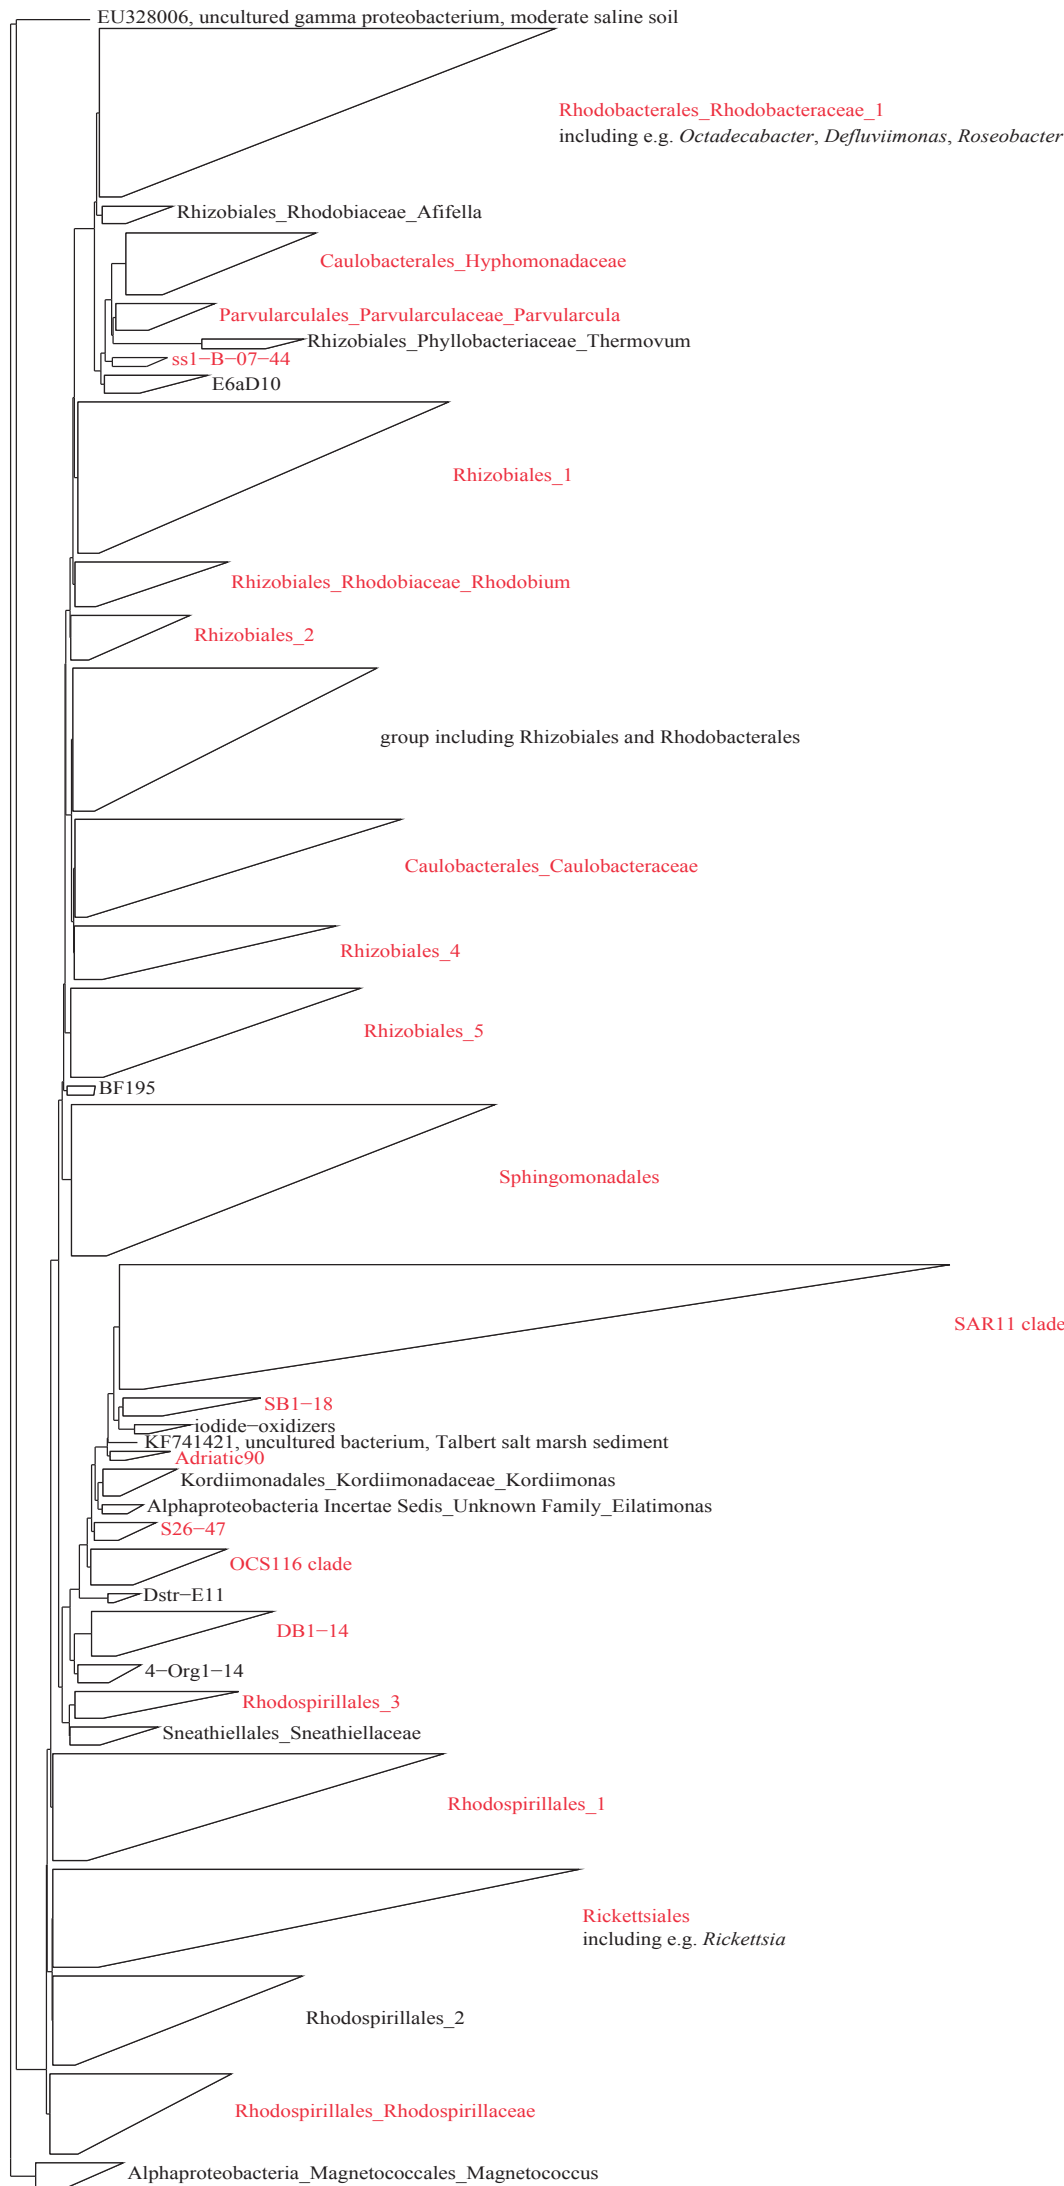

## Gammaproteobacteria

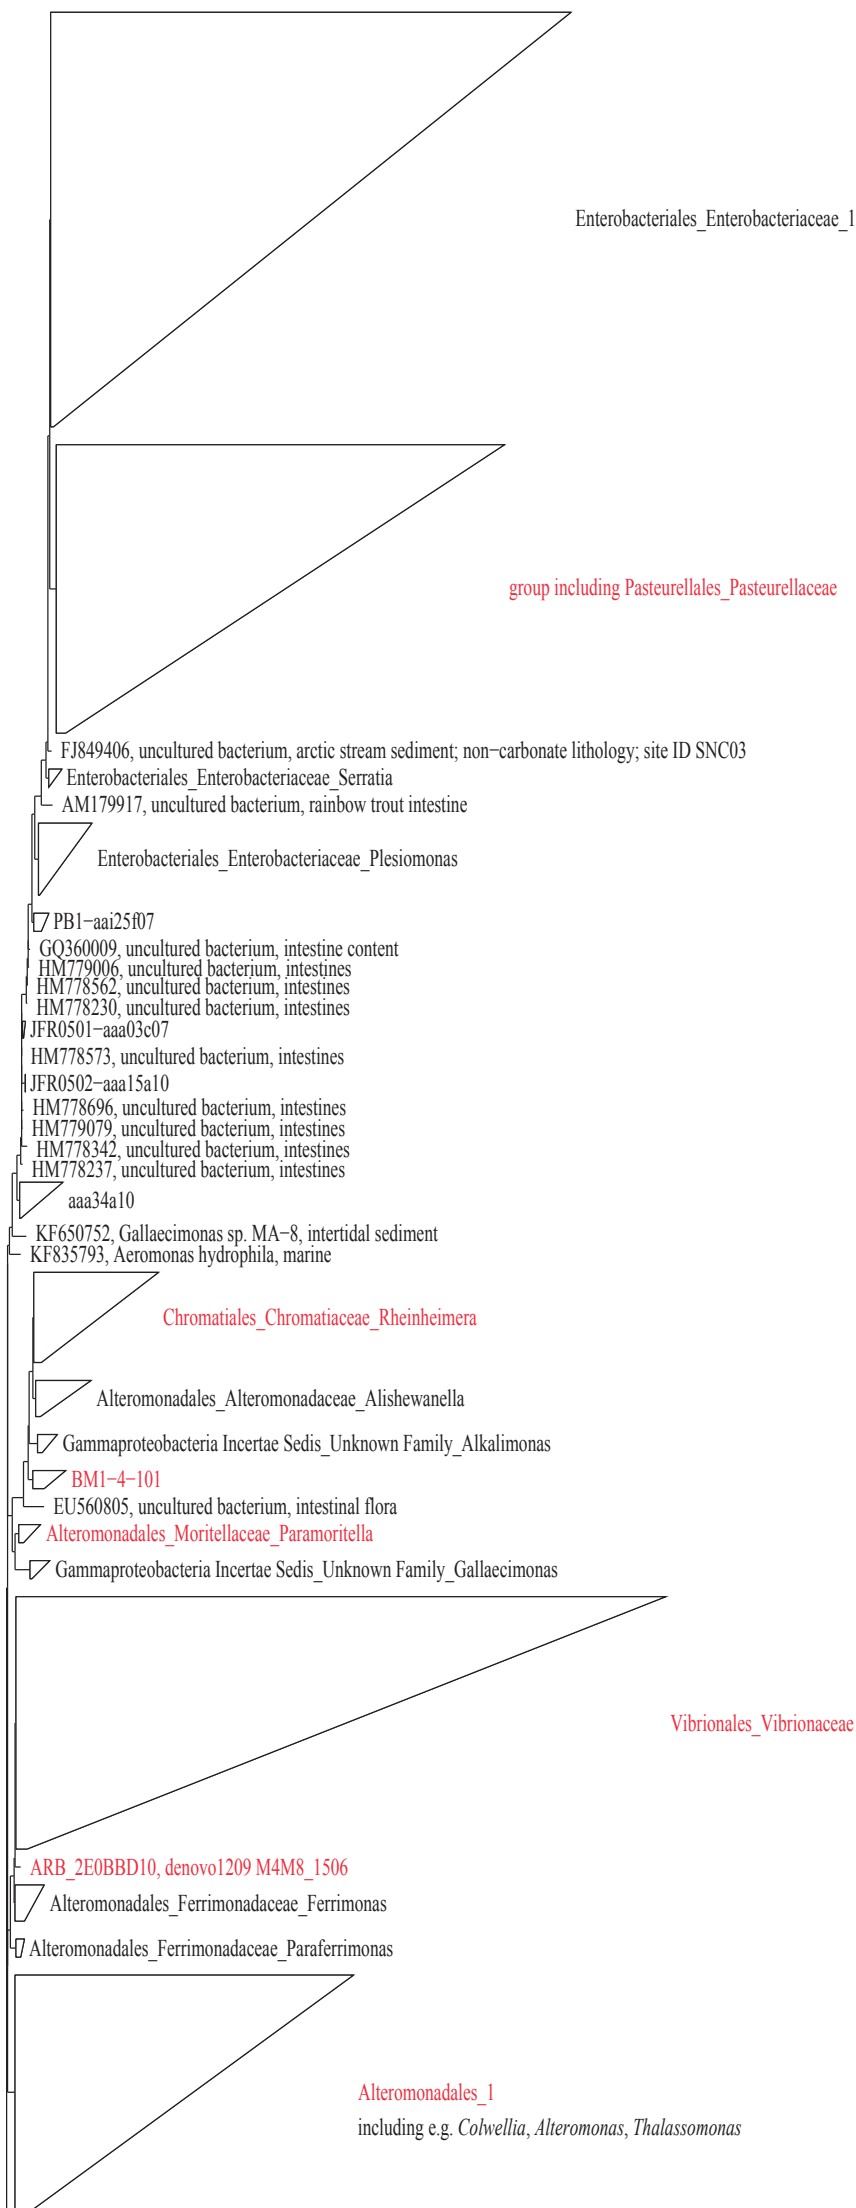



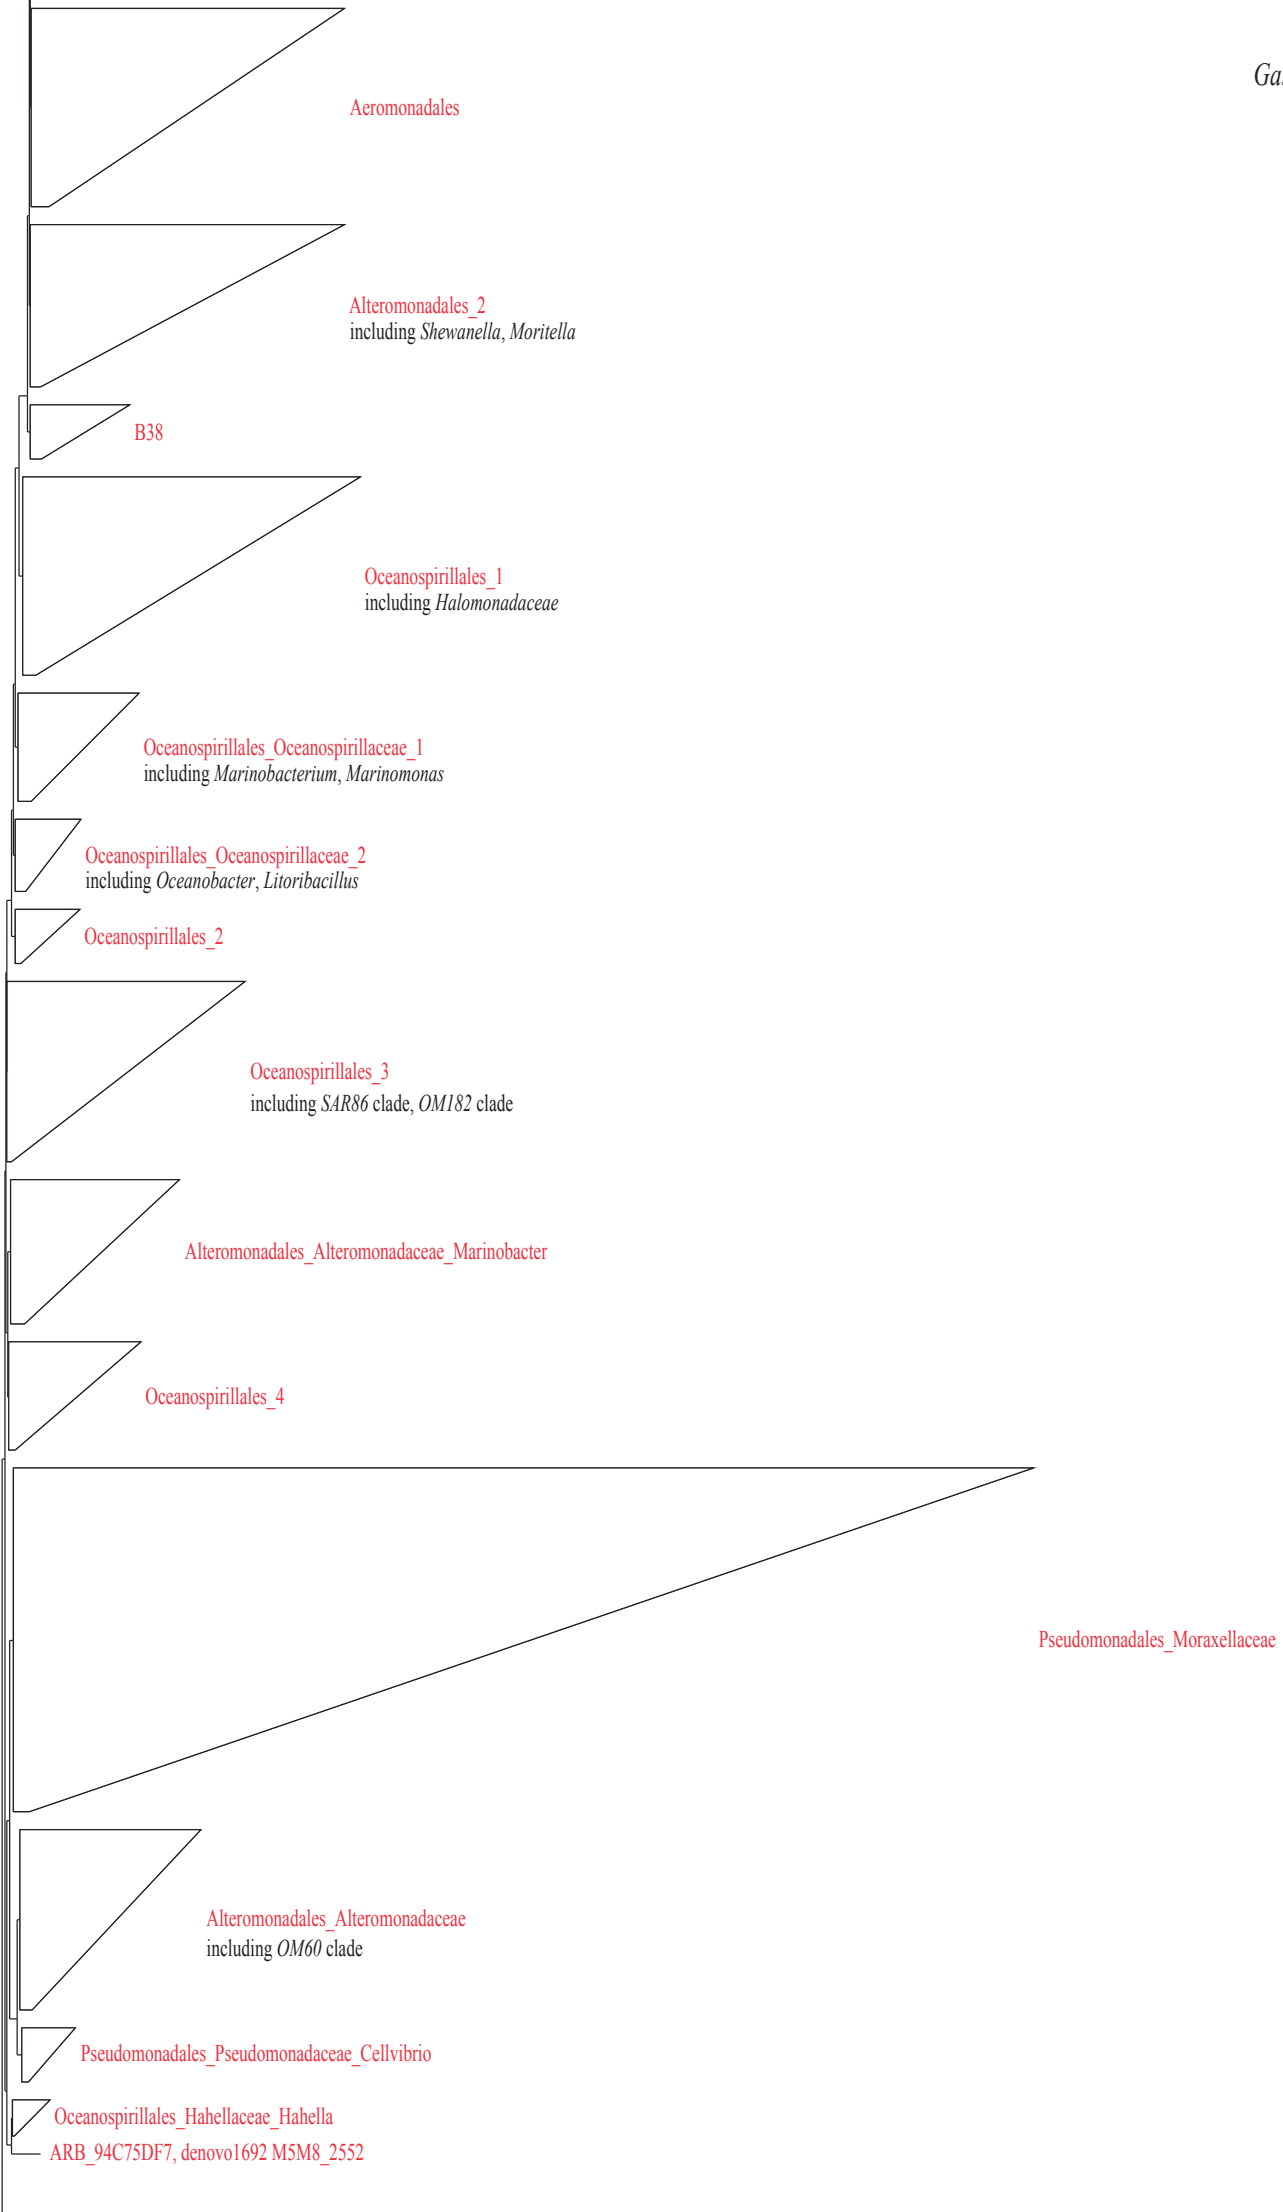

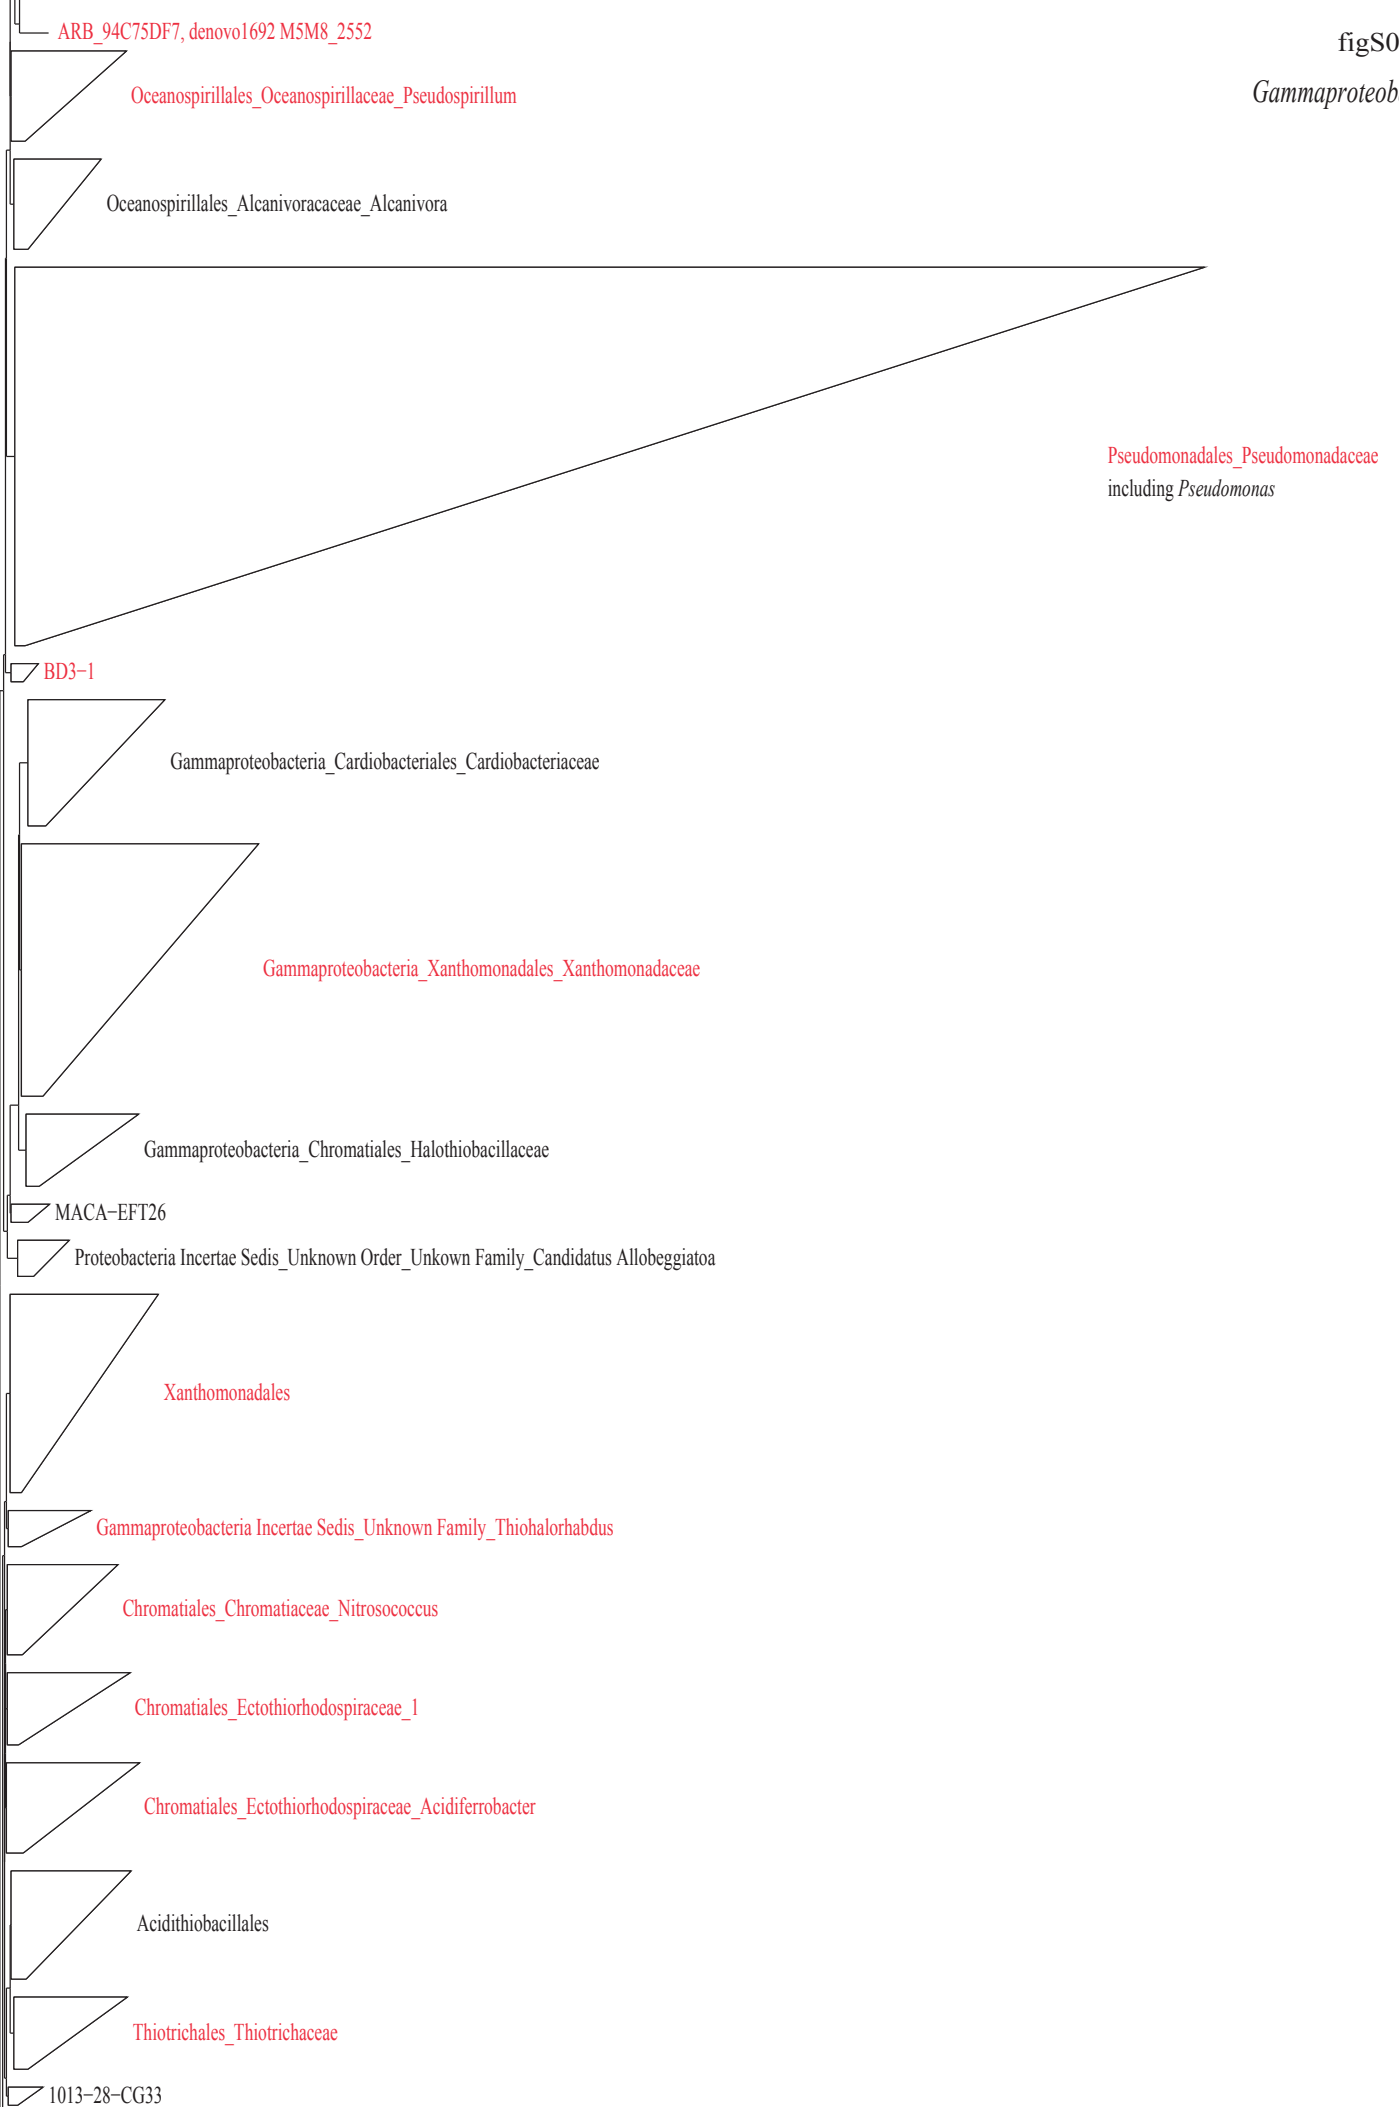

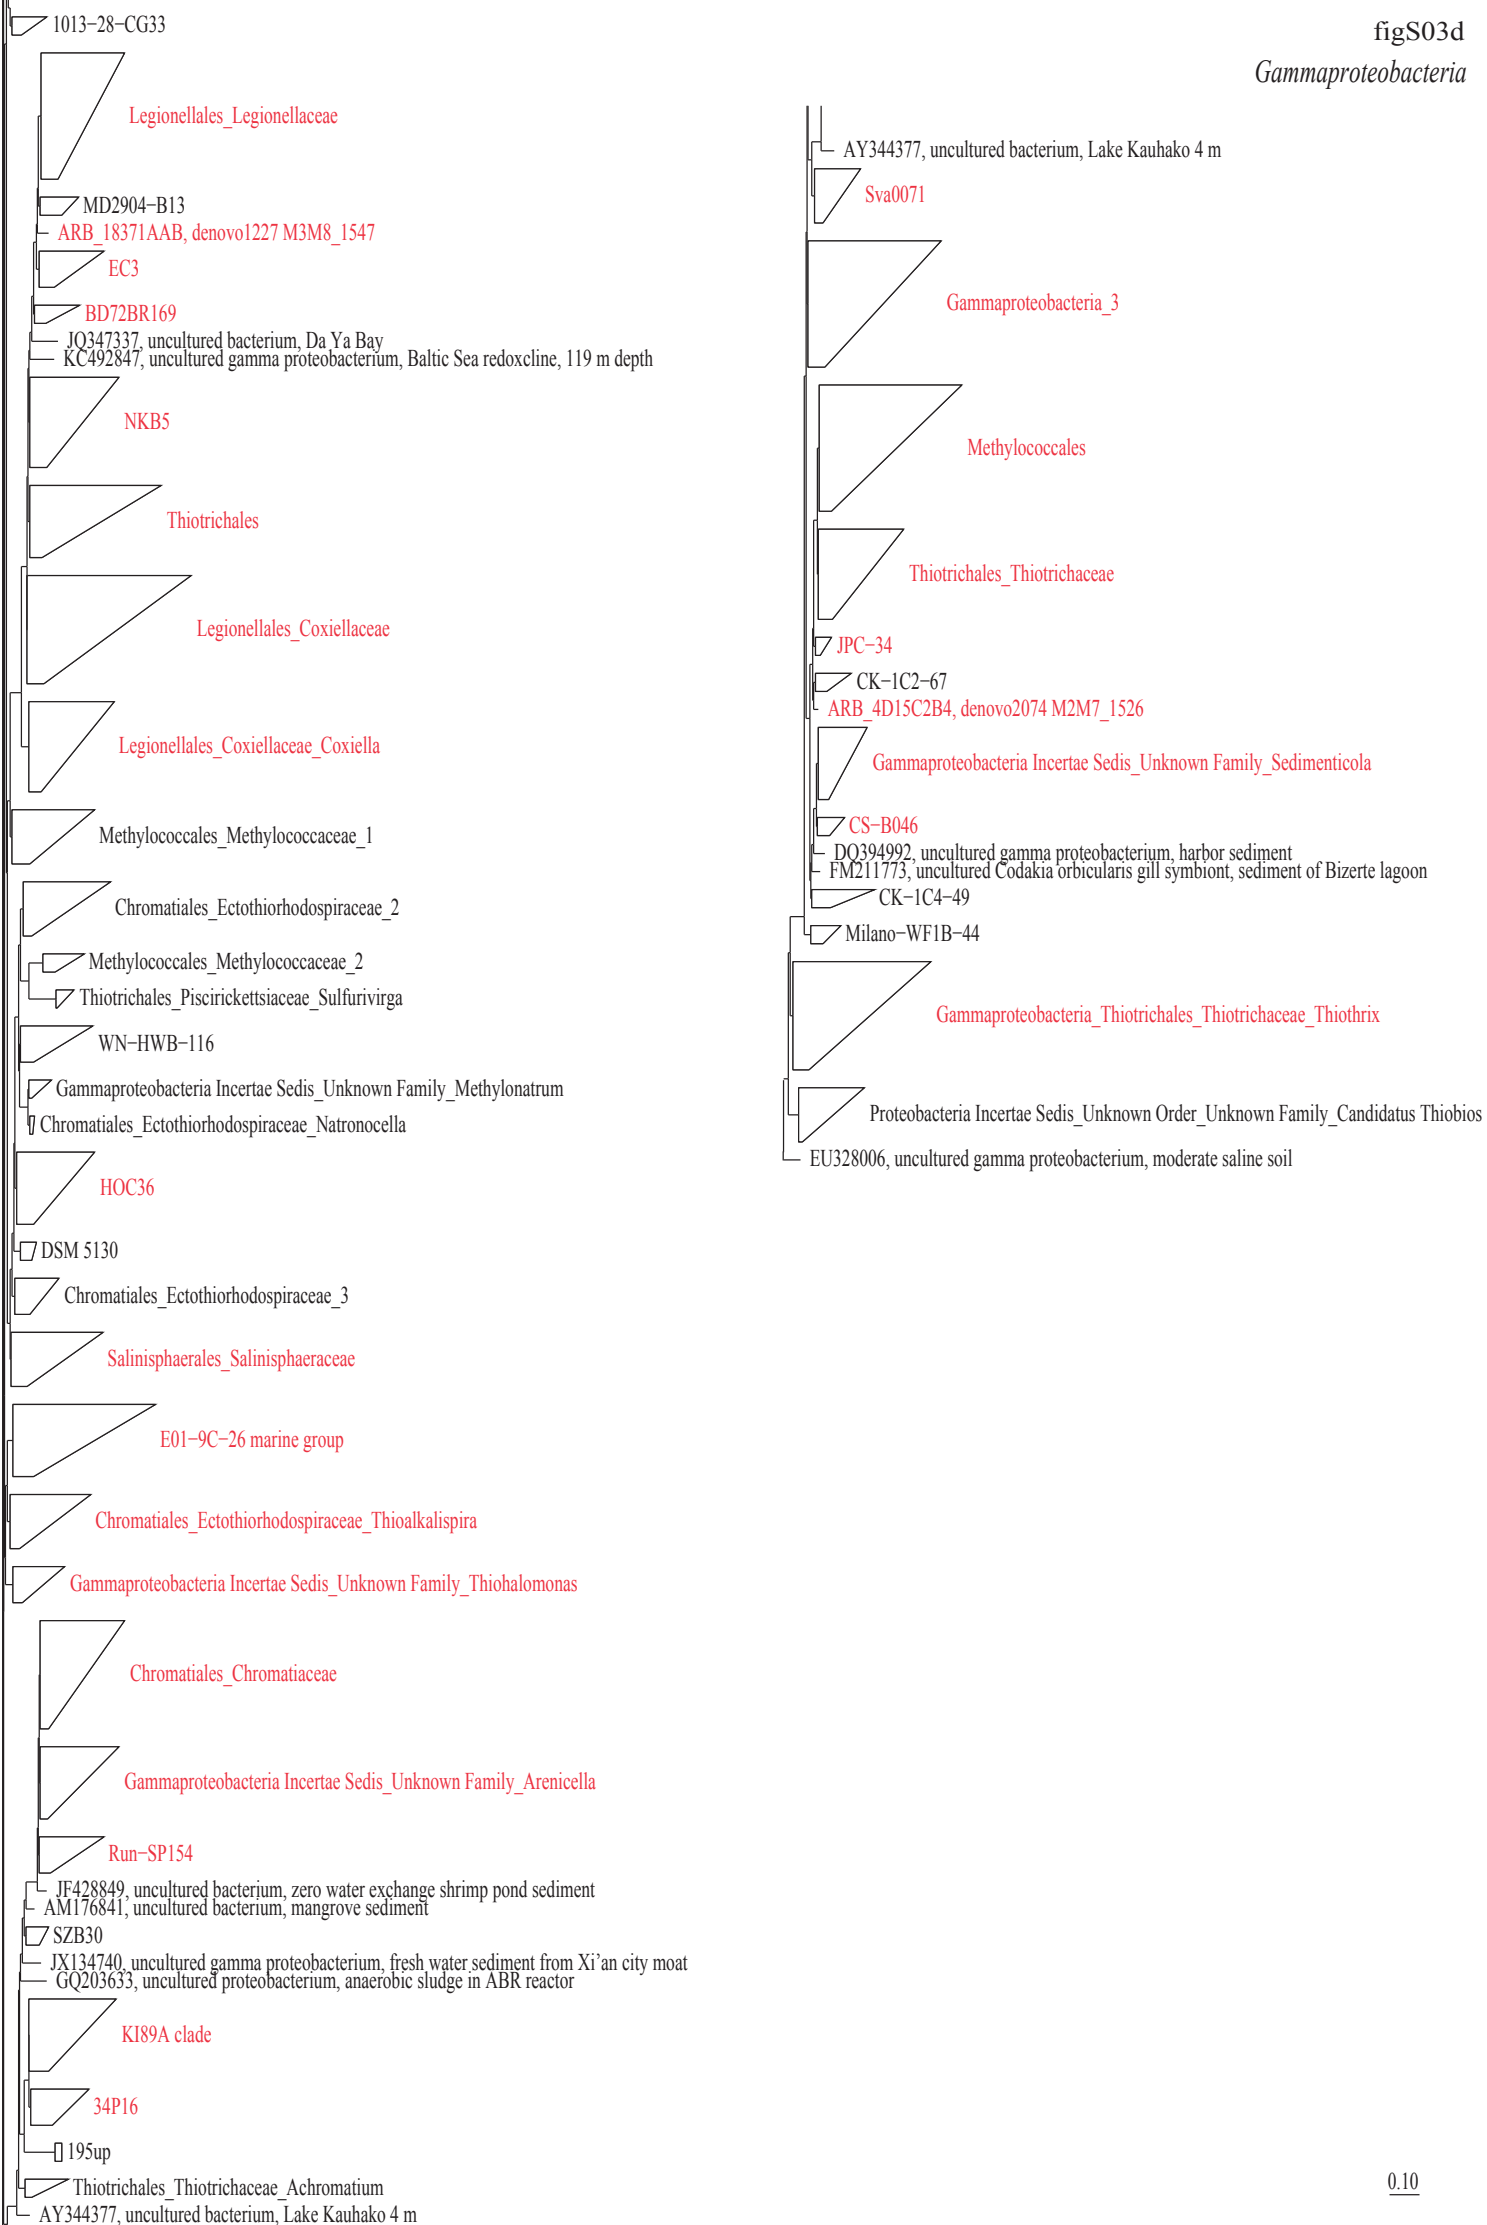

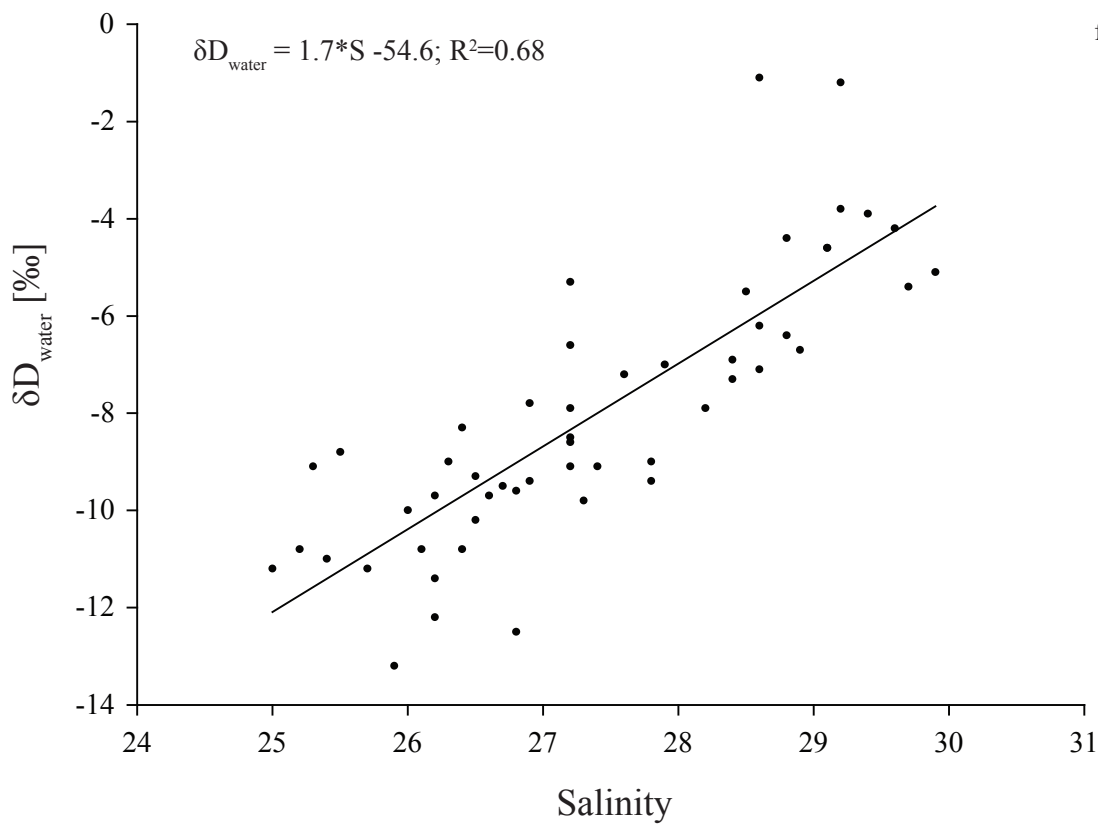

Supplement: Supplementary file 1 [file bg-2016-125-supplement.pdf]
